# Supplementary material for: Electrophilic α-cyanation of 1,3-dicarbonyl compounds
Source: Royal Society of Chemistry journal article supplement (doi:10.1039/c3ra41376d), 2013-01-01

# Electrophilic $\alpha$ -Cyanation of 1,3-Dicarbonyl Compounds

Ramulu Akula, Yan Xiong and Hasim Ibrahim\*

*Centre for Synthesis and Chemical Biology, School of Chemistry and Chemical Biology,*

*University College Dublin, Belfield, Dublin 4, Ireland.*

*hasim.ibrahim@ucd.ie*

## Supporting Information

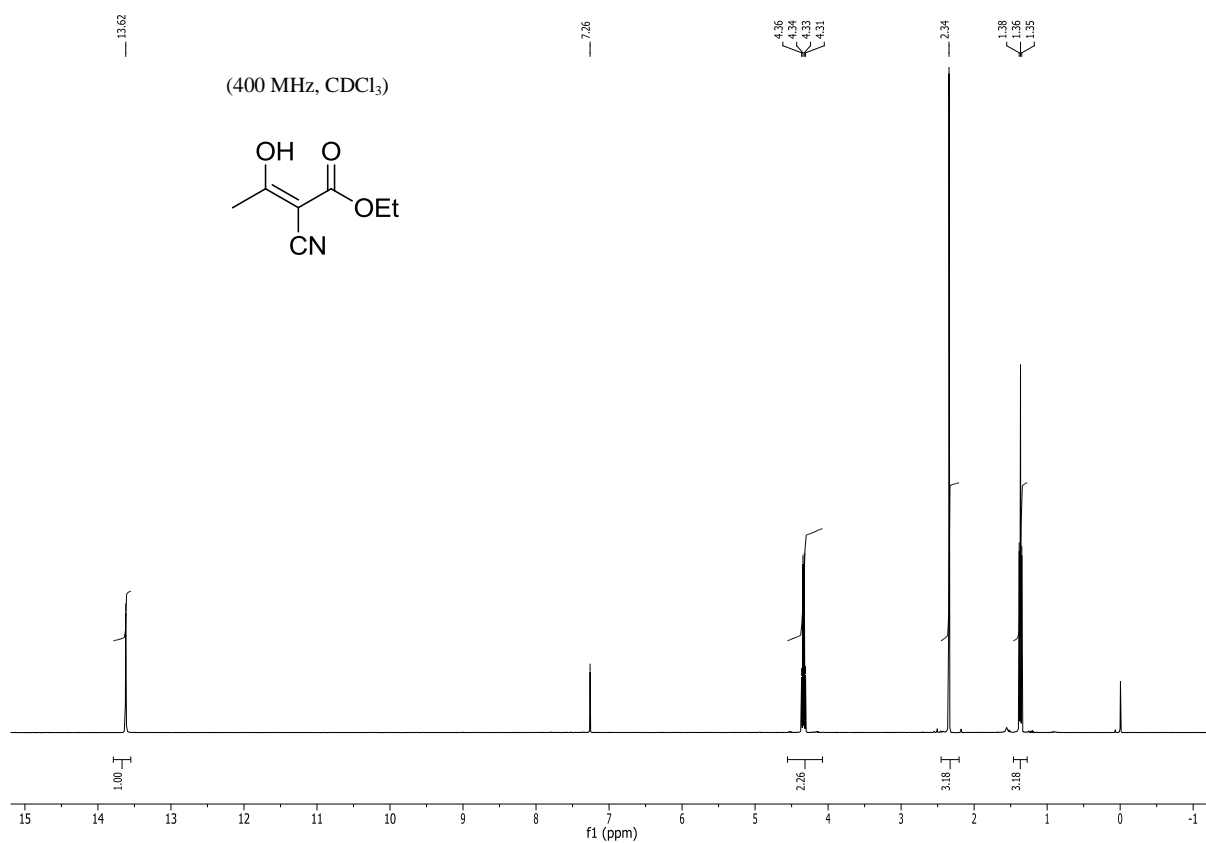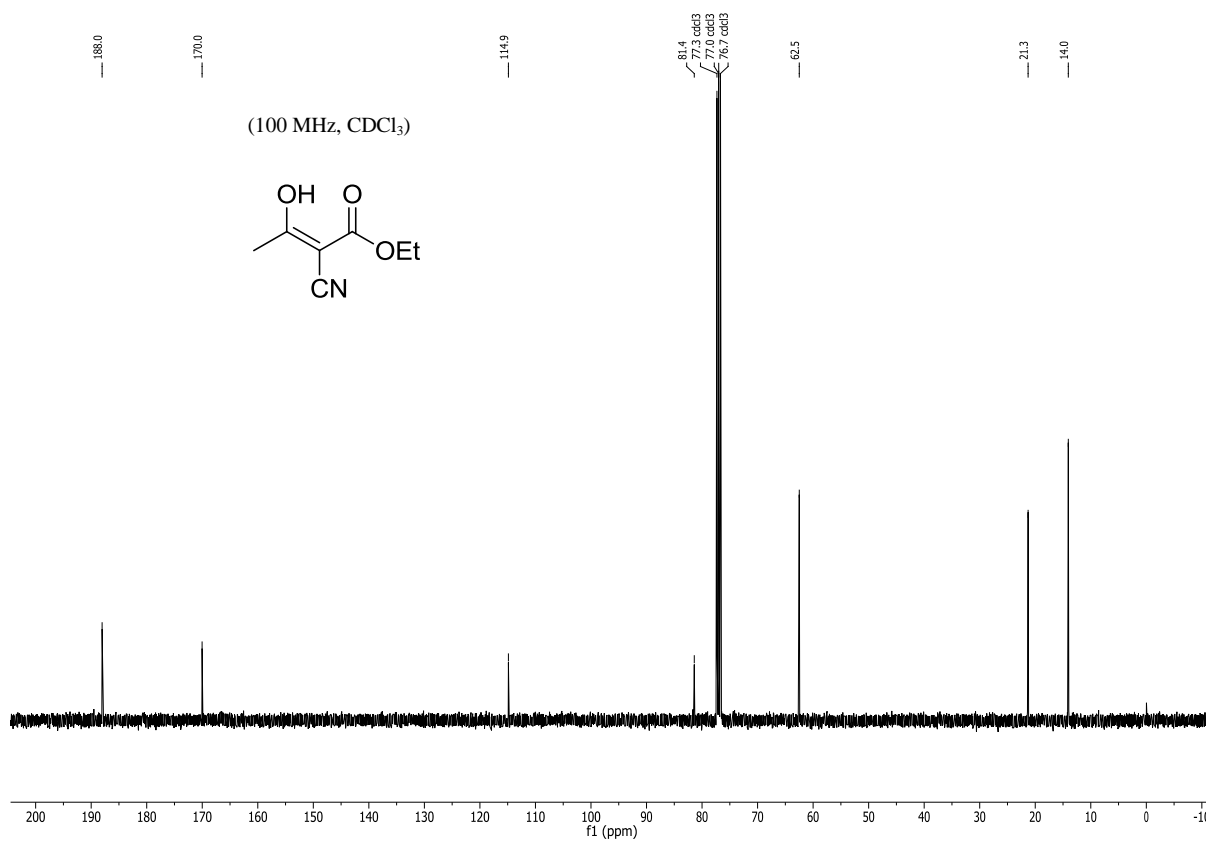

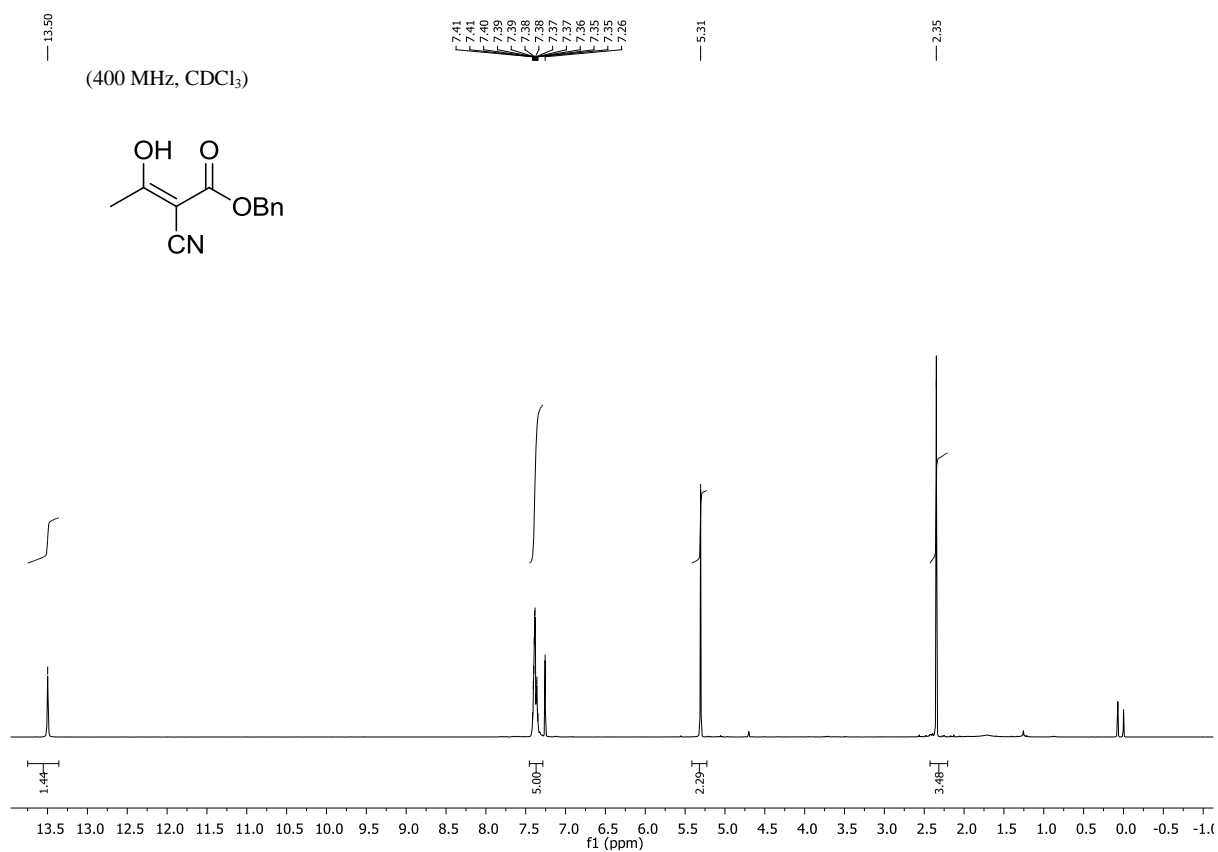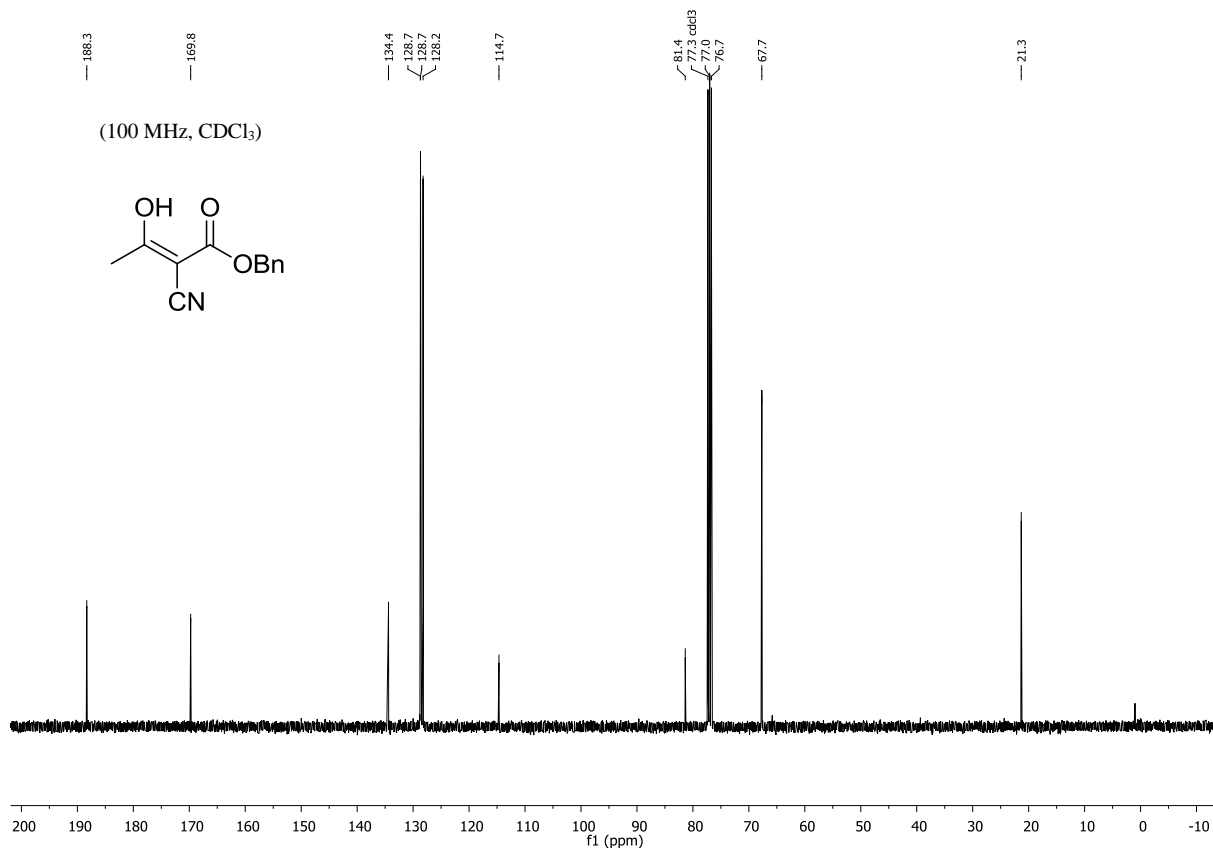

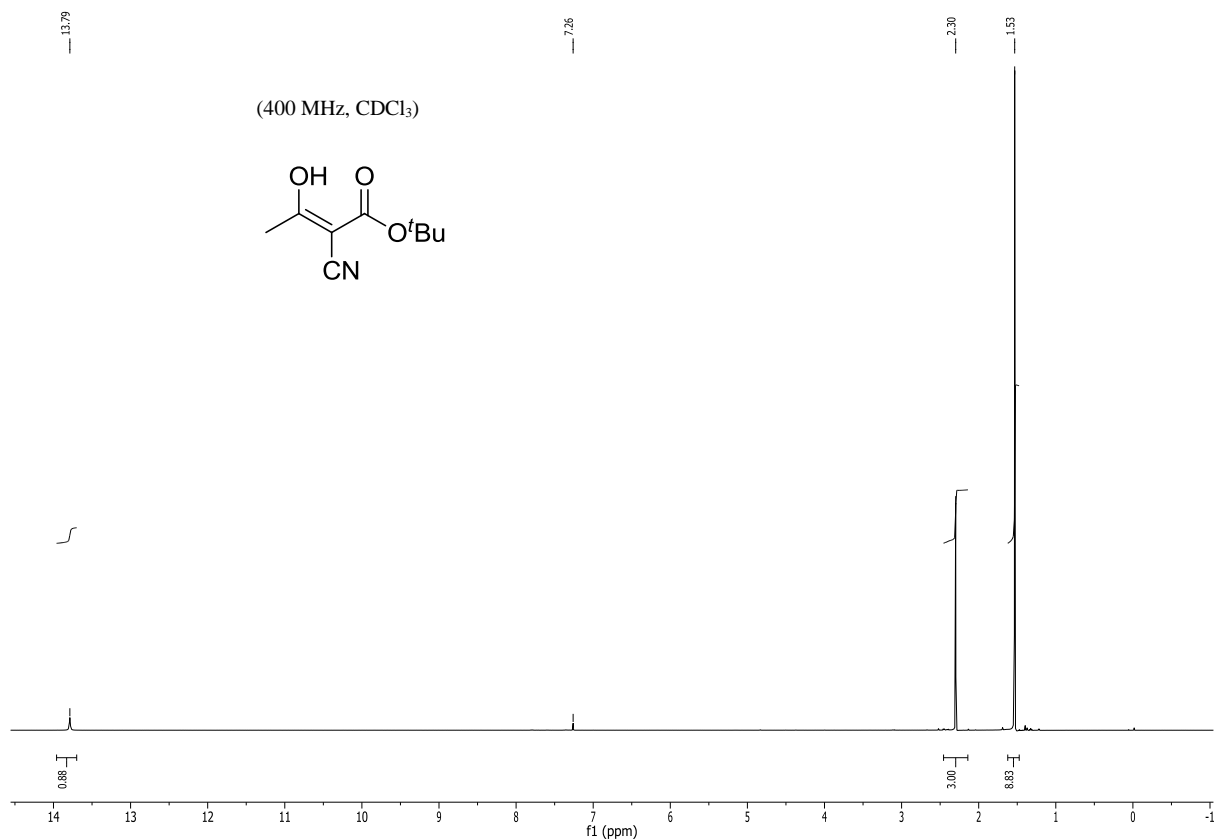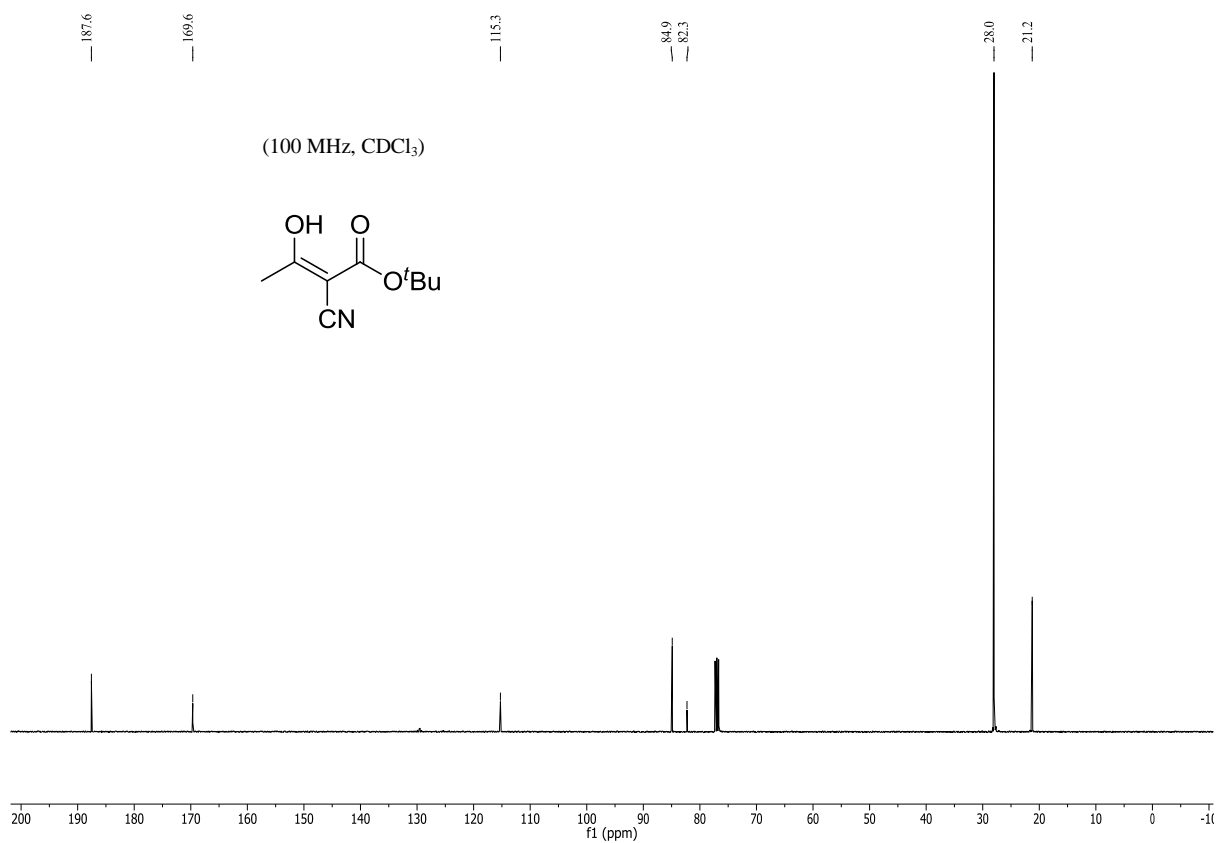

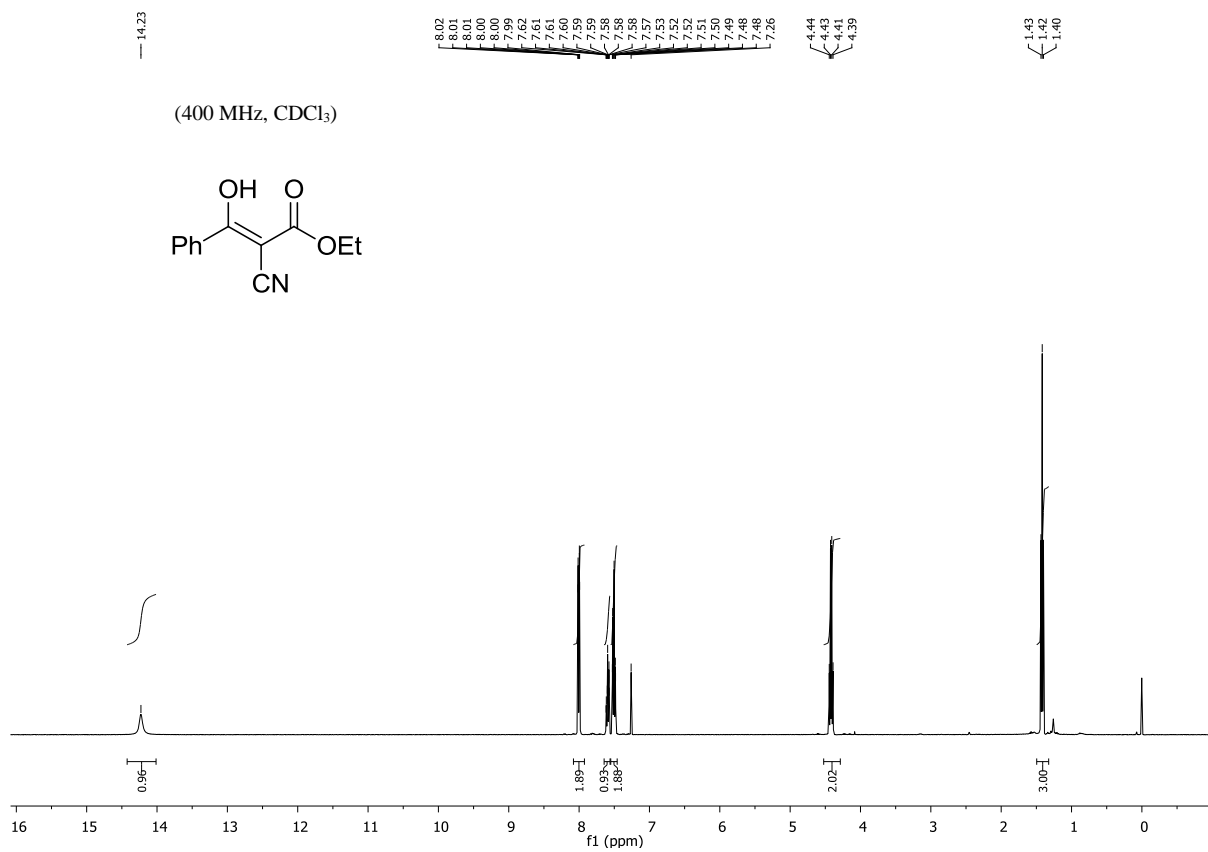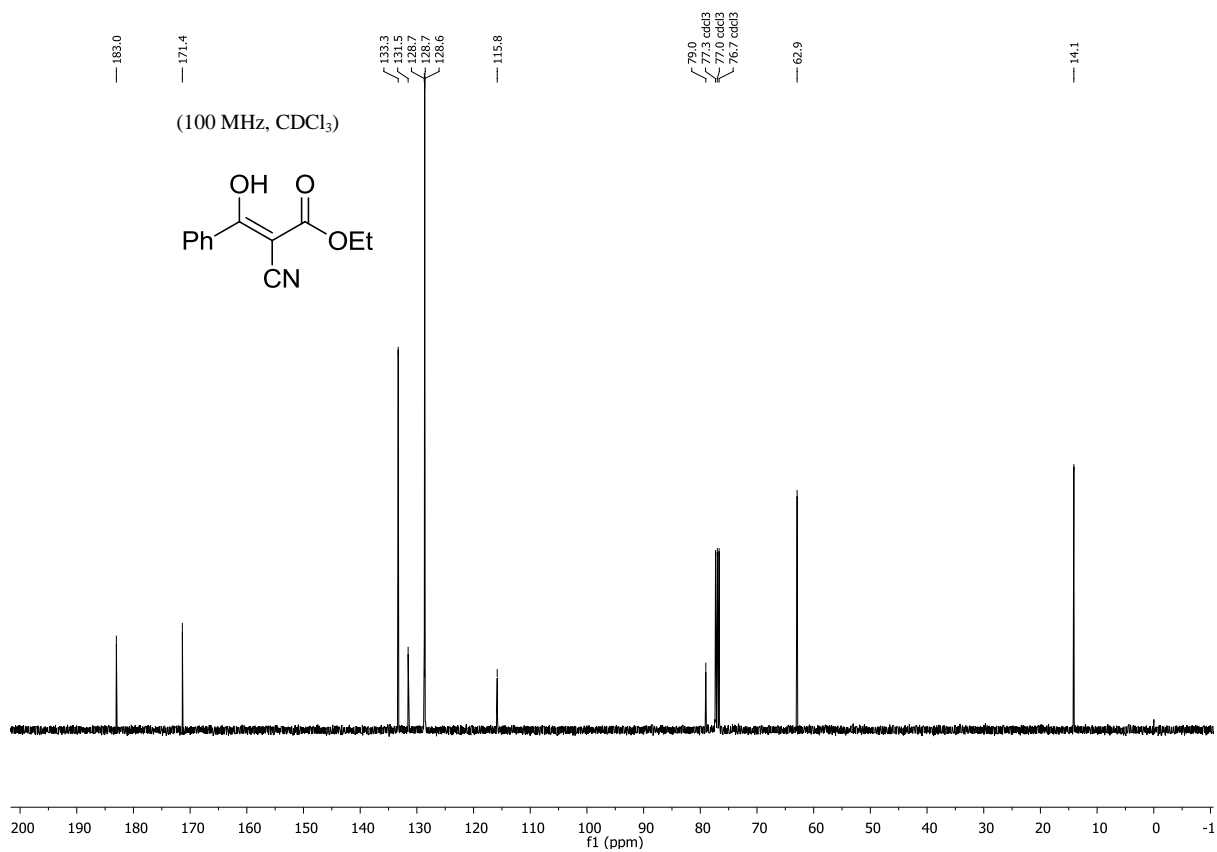

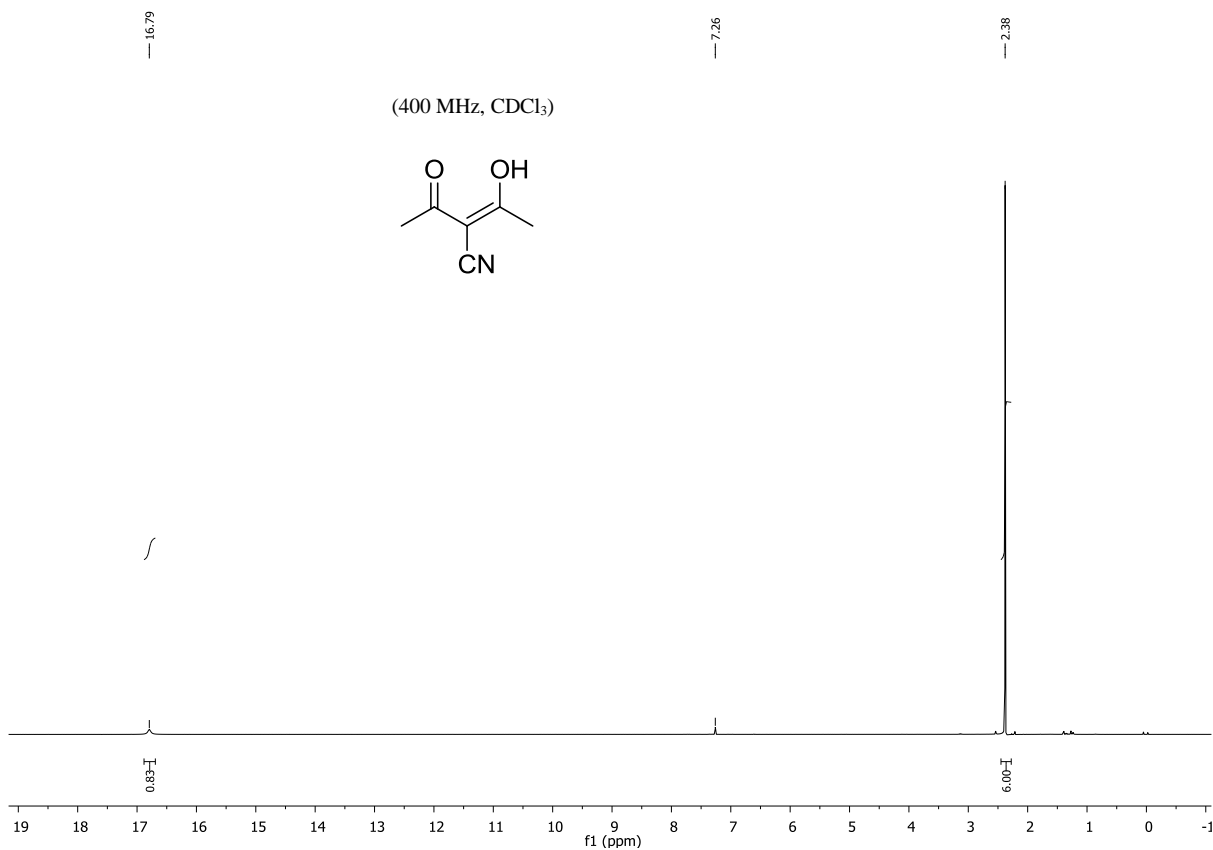

RA-4-33

Sample Name:  
RA-4-33  
Data Collected on:  
ucd400-vnmrs400  
Archive directory:  
/home/walkup/vnmrsys/data/R\_Akula  
Sample directory:  
RA-4-33\_20100513\_02  
FidFile: CARBON\_001

Pulse Sequence: CARBON (s2pul)  
Solvent: cdcl3  
Data collected on: May 13 2010

Temp. 25.0 C / 298.1 K  
Sample #2, Operator: R\_Akula

Relax. delay 1.000 sec  
Pulse 45.0 degrees  
Acq. time 1.235 sec  
Width 25510.2 Hz  
896 repetitions  
OBSERVE C13, 100.5170514 MHz  
DECOUPLE H1, 399.7513382 MHz  
Power 40 dB  
continuously on  
WALTZ-16 modulated  
DATA PROCESSING  
Line broadening 0.5 Hz  
FT size 55336  
Total time 1 hr, 16 min

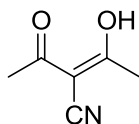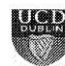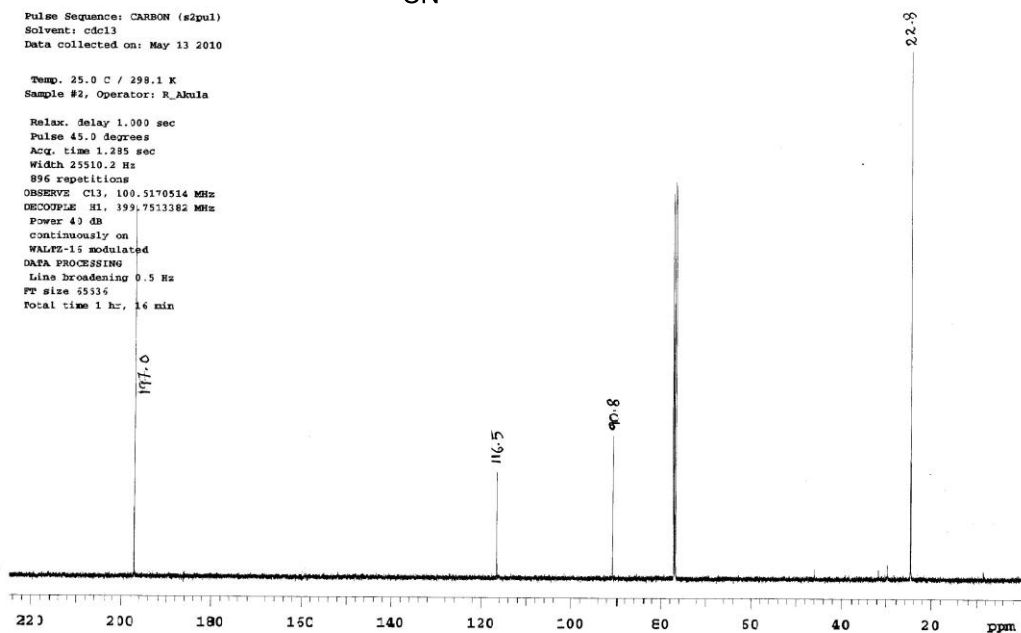

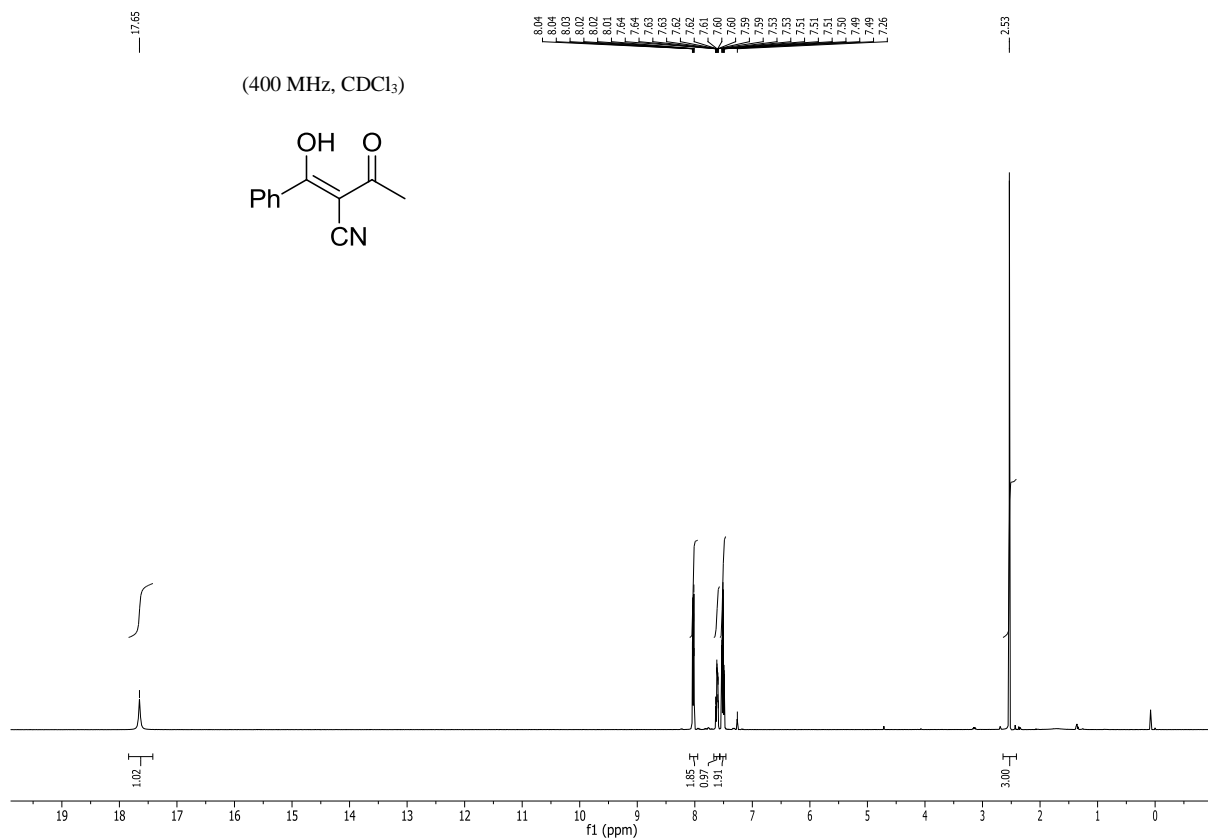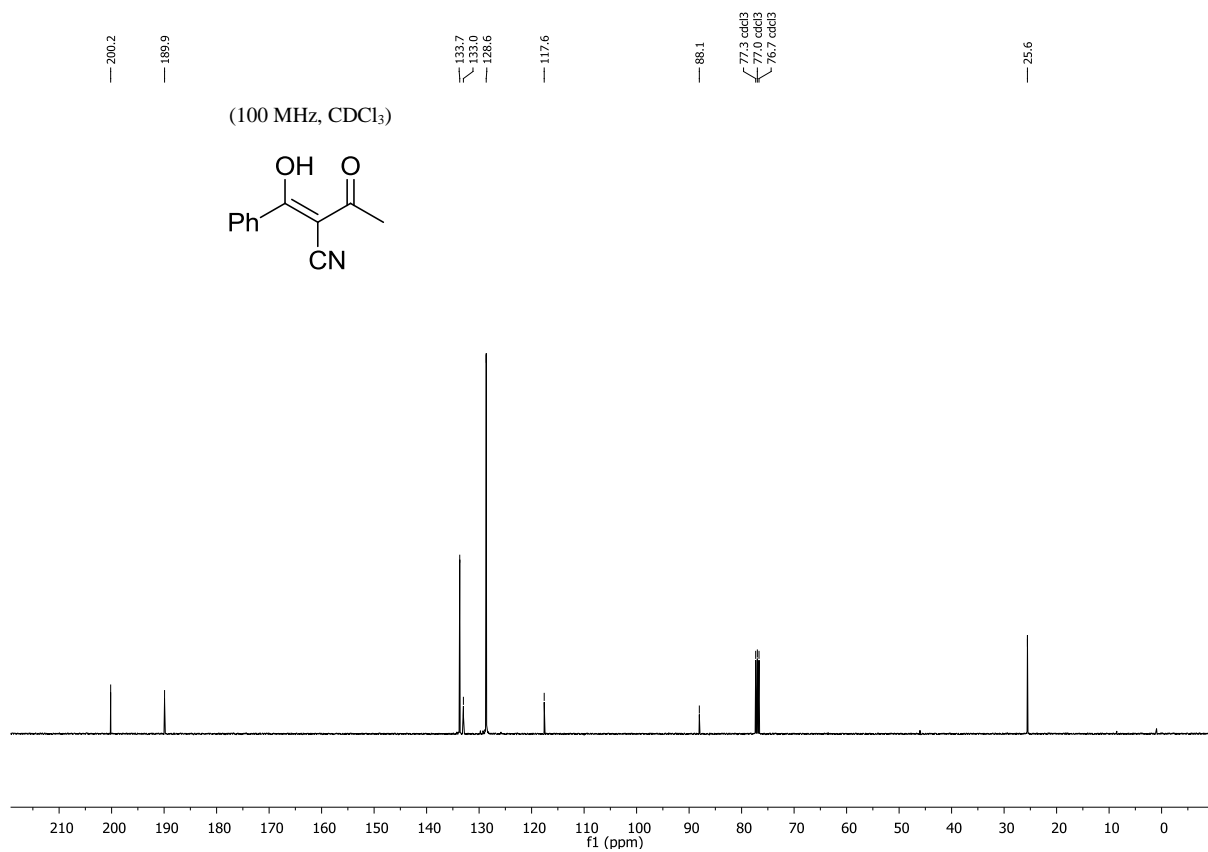

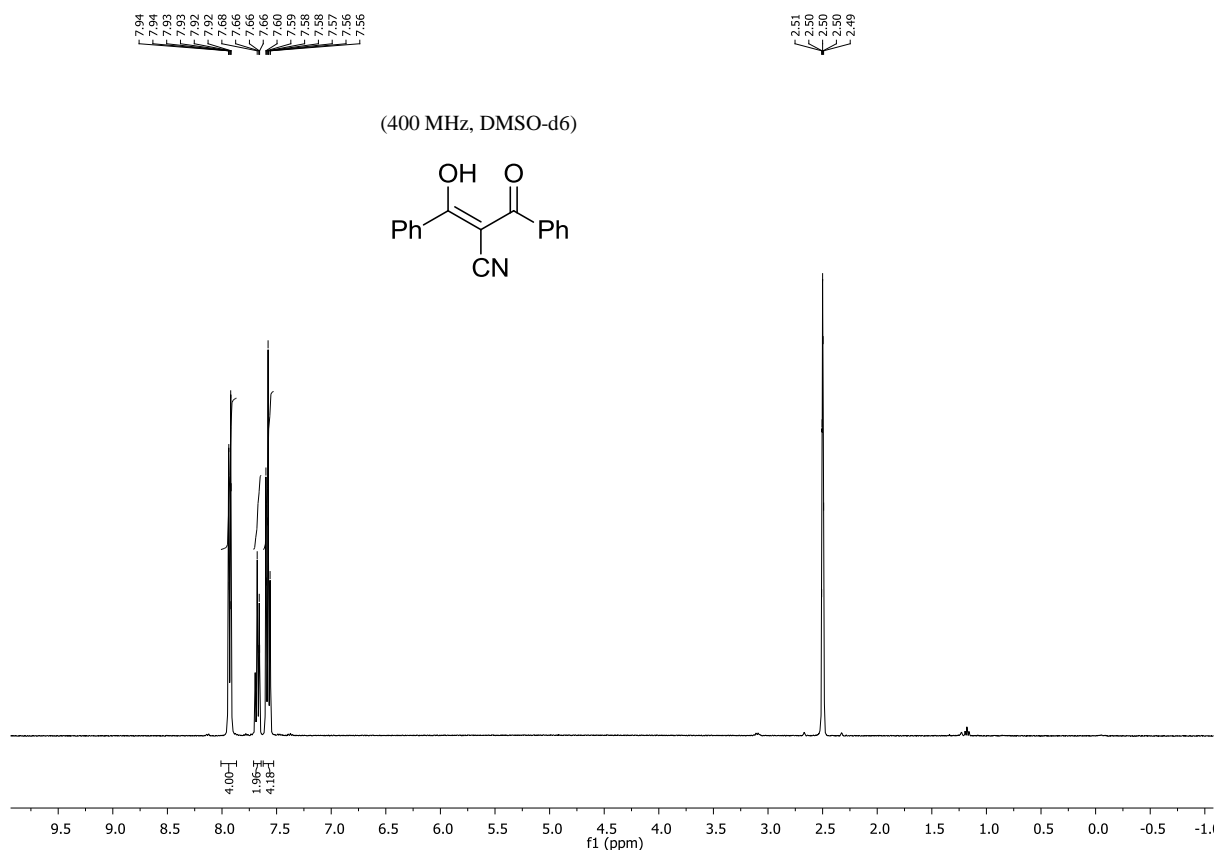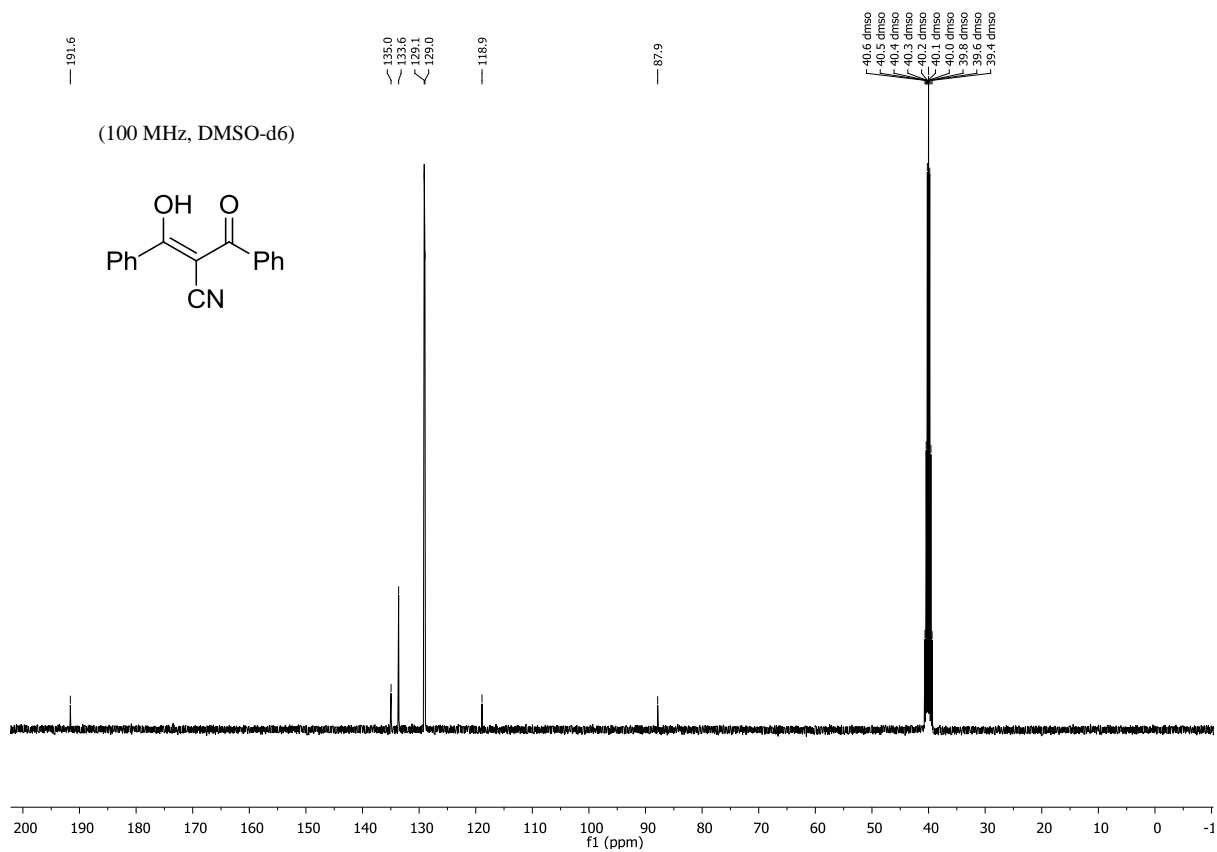



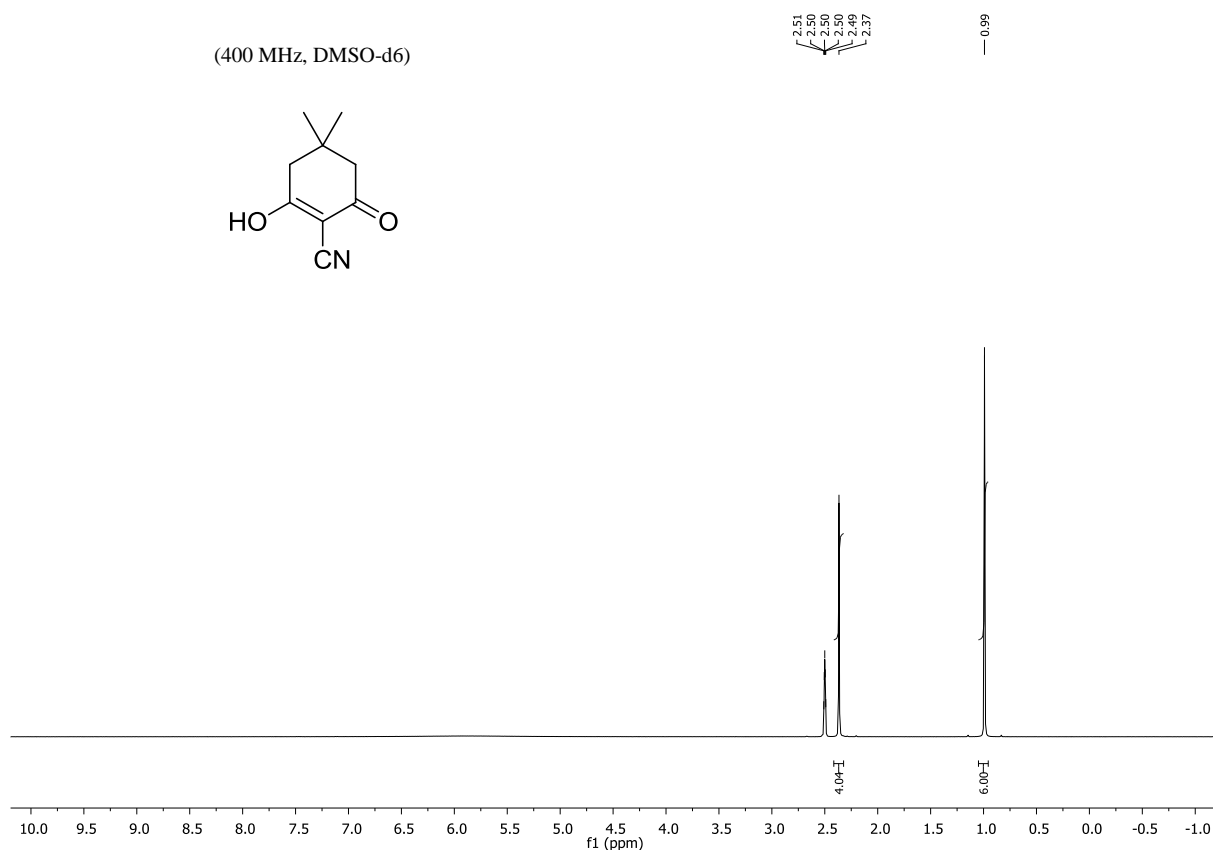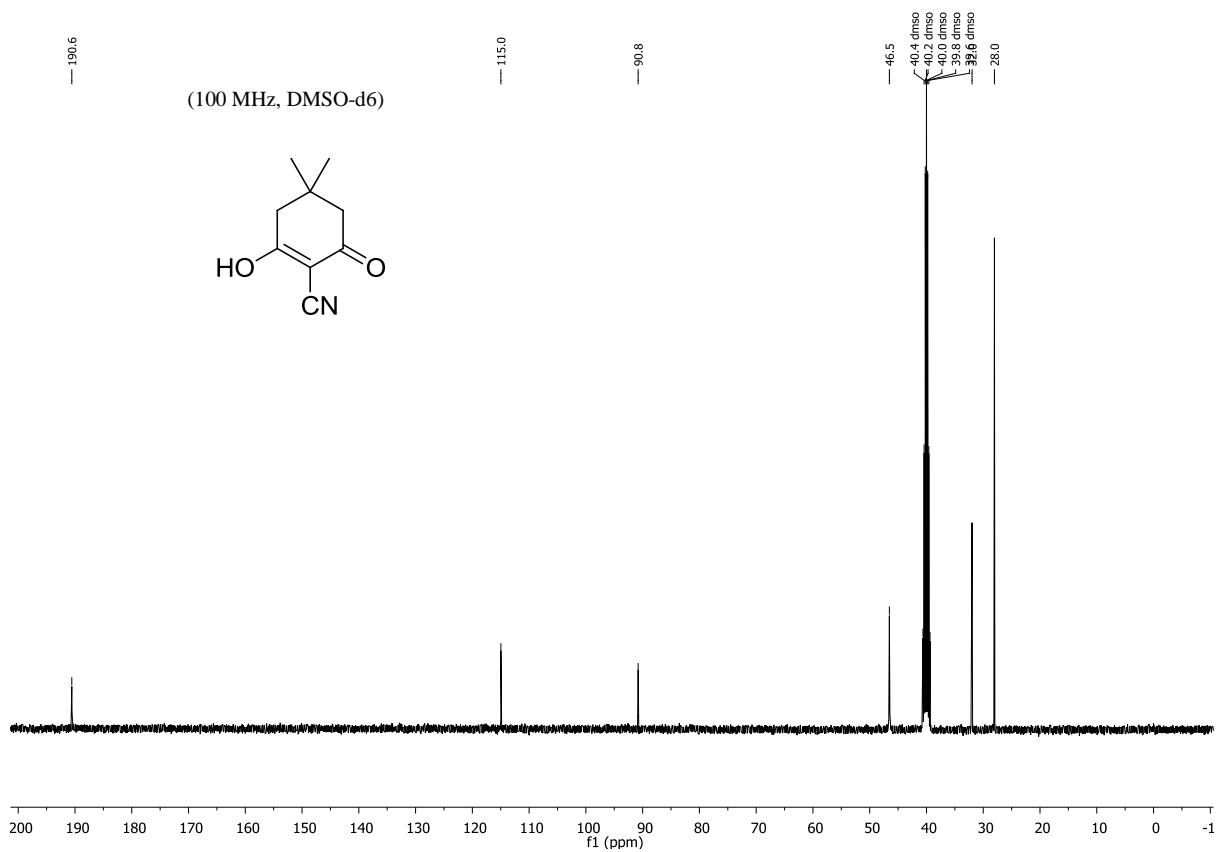

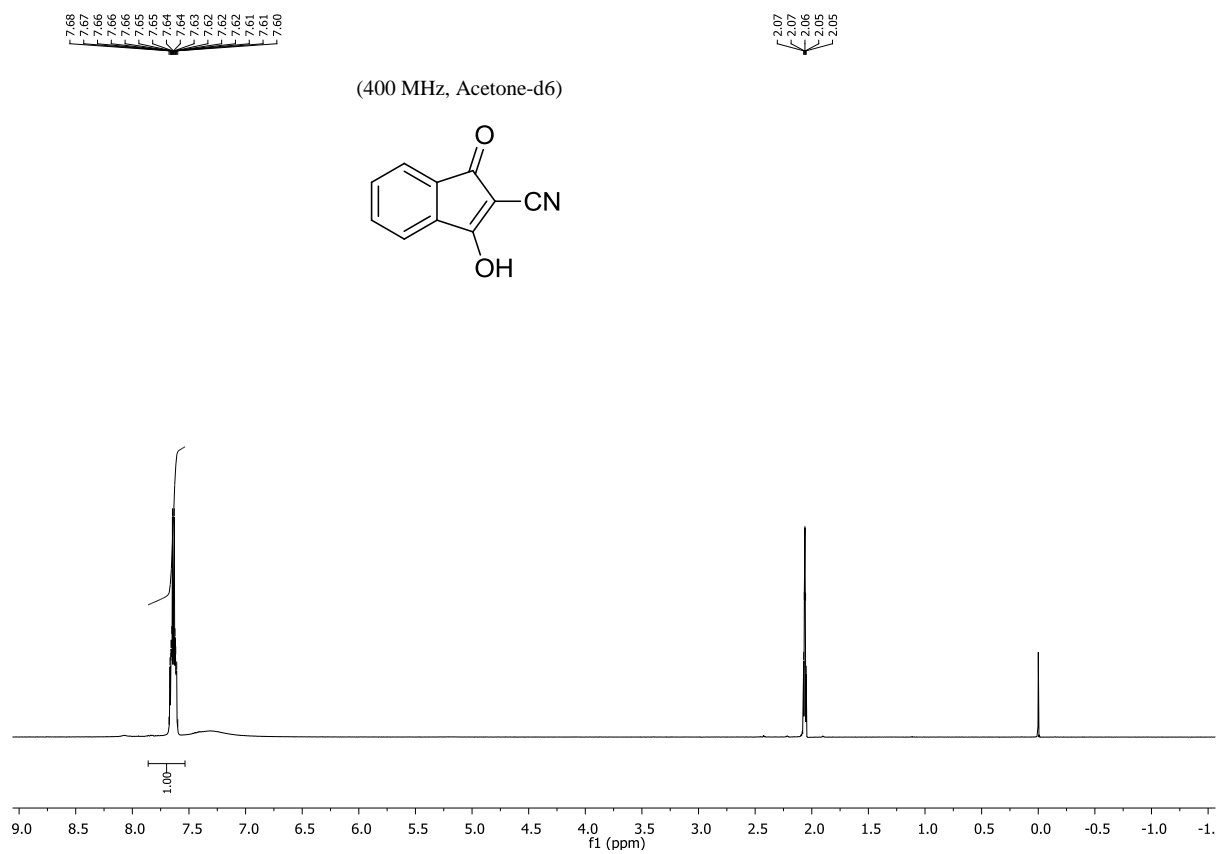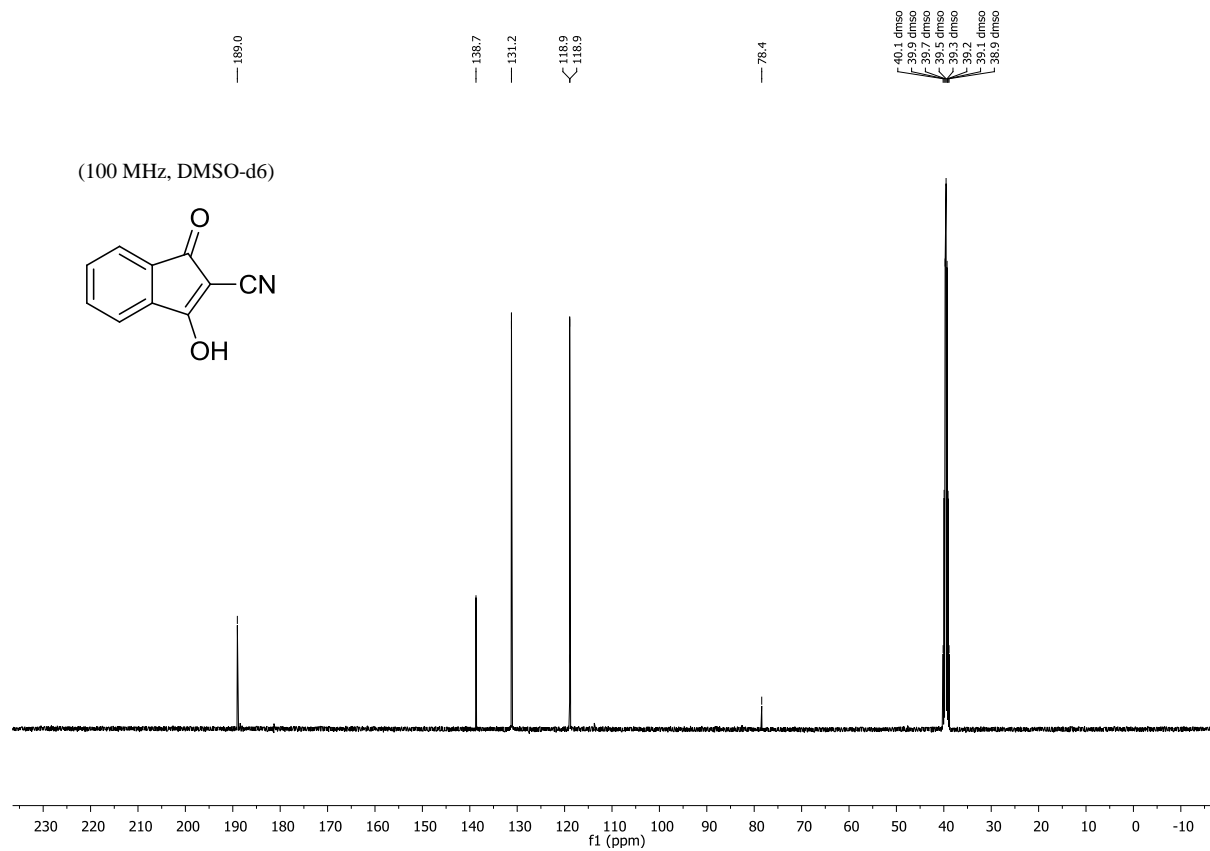

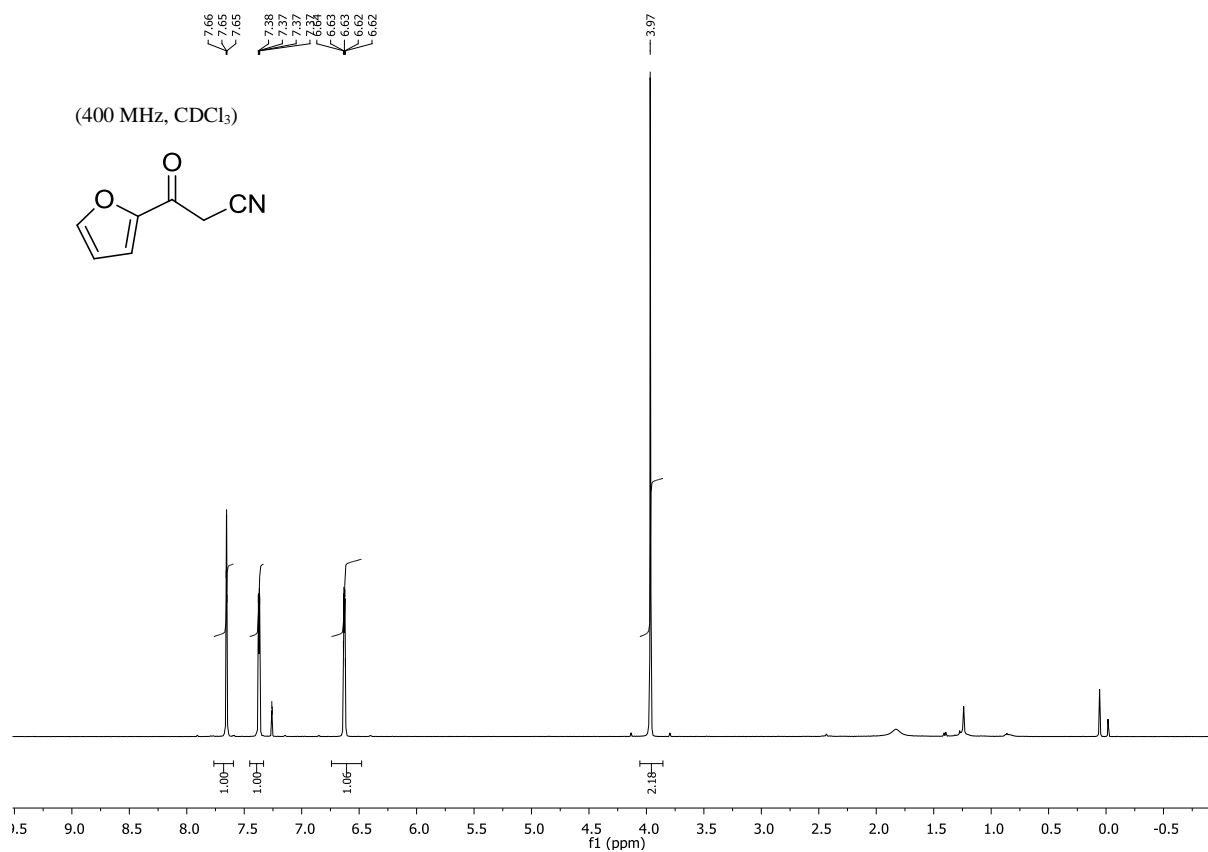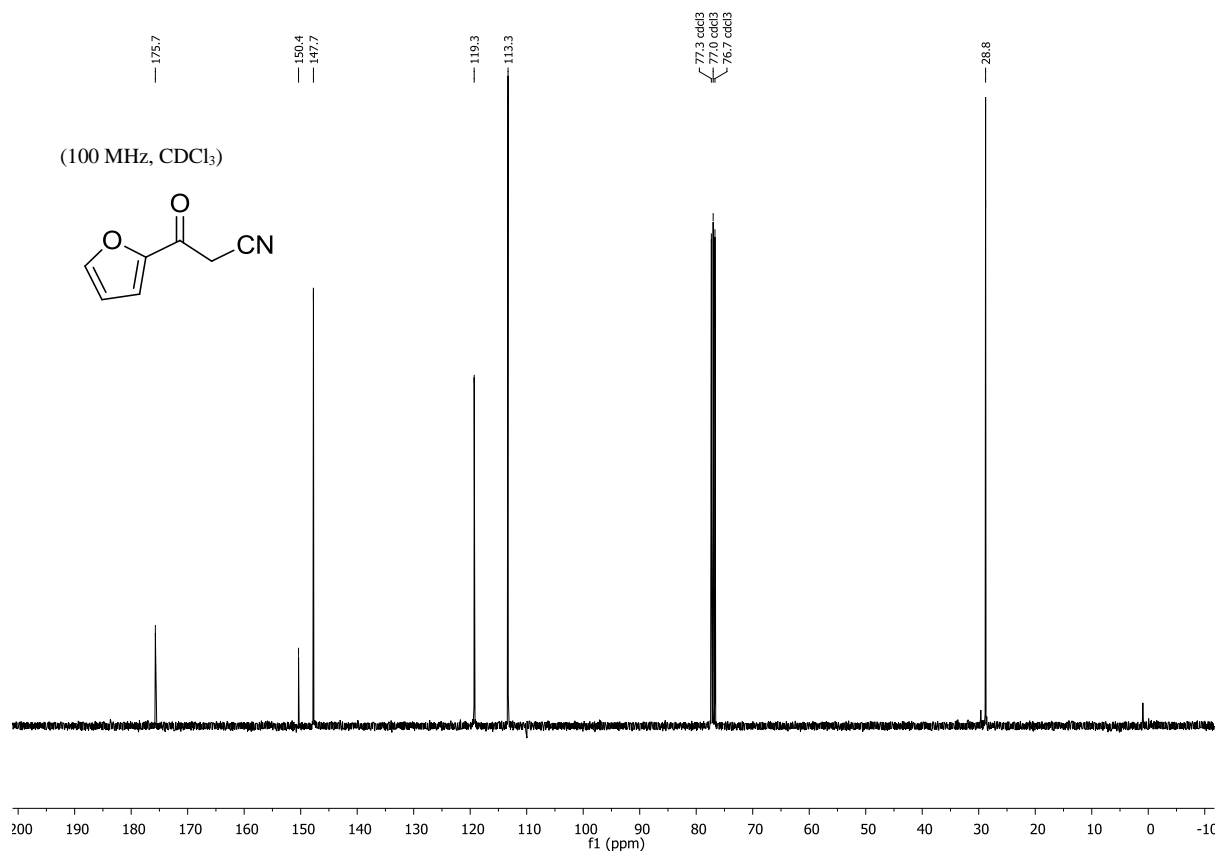

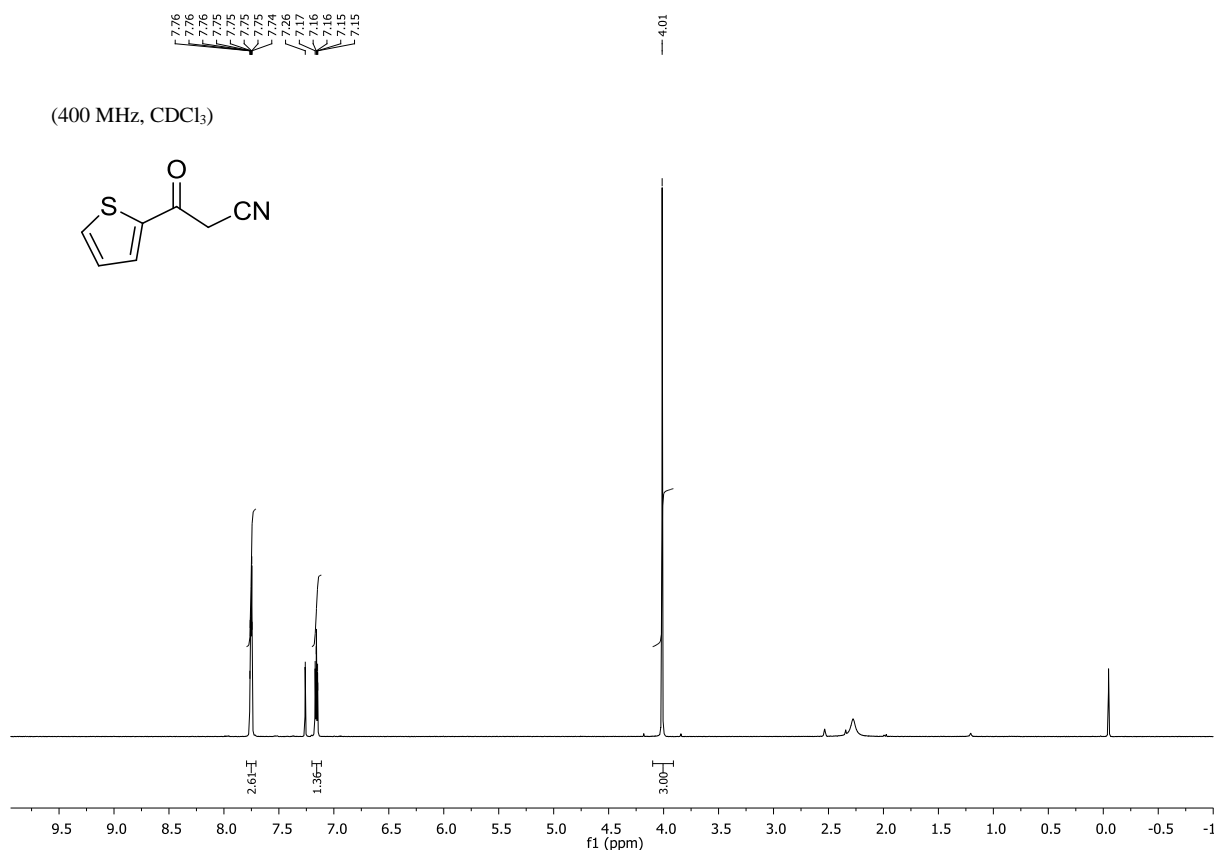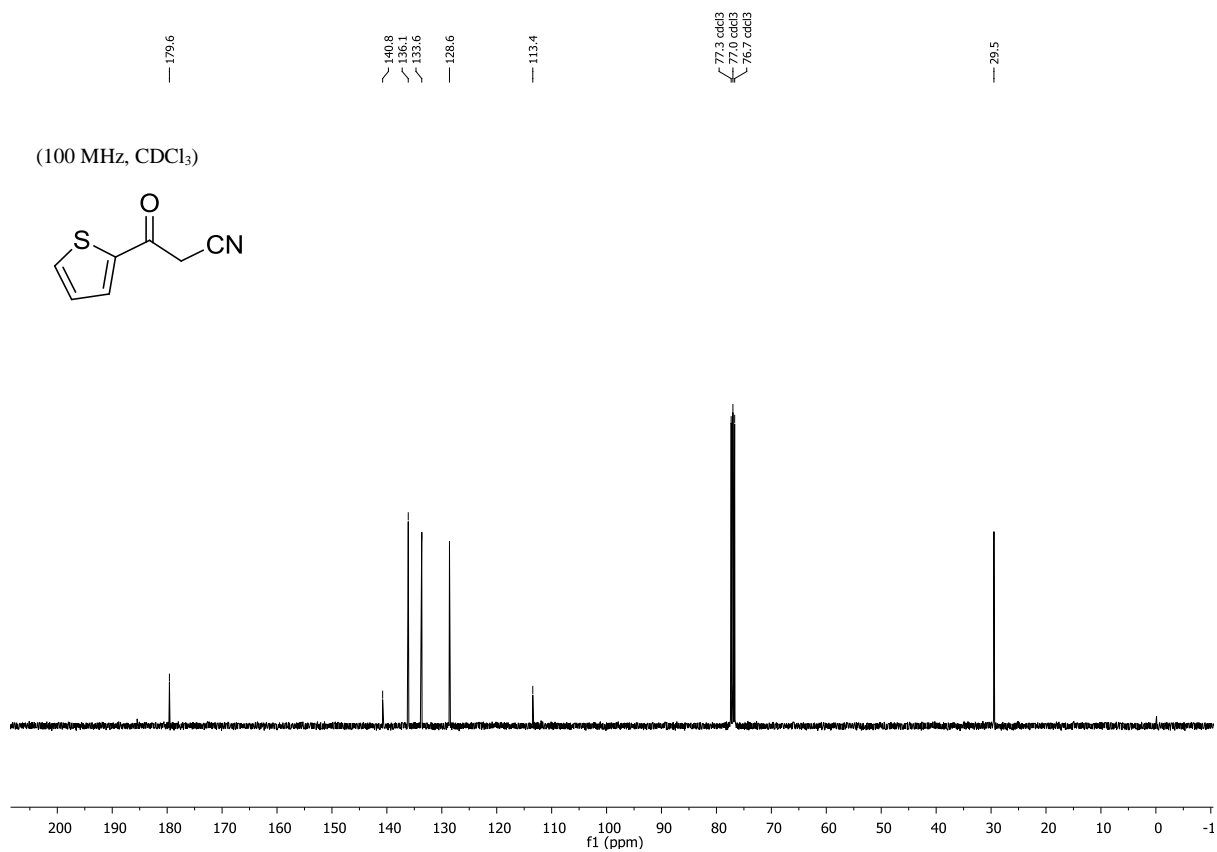

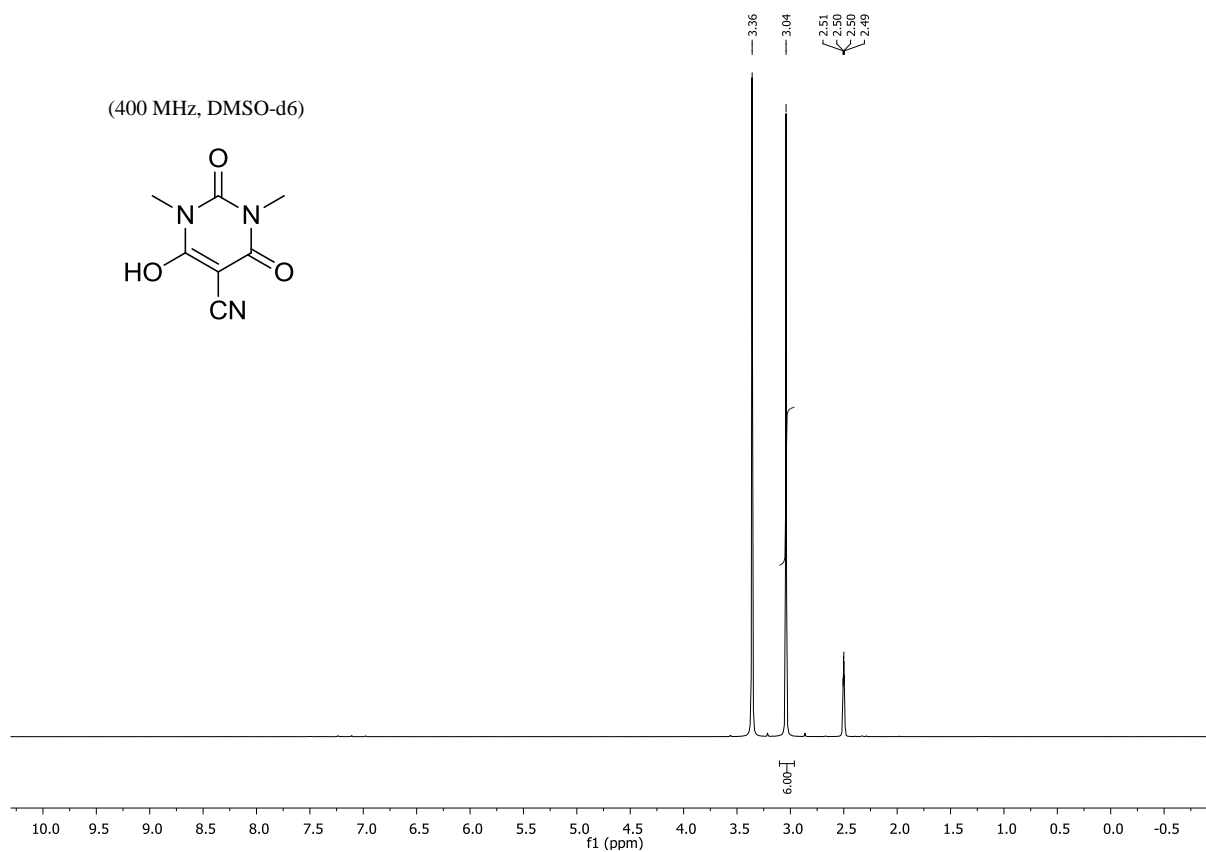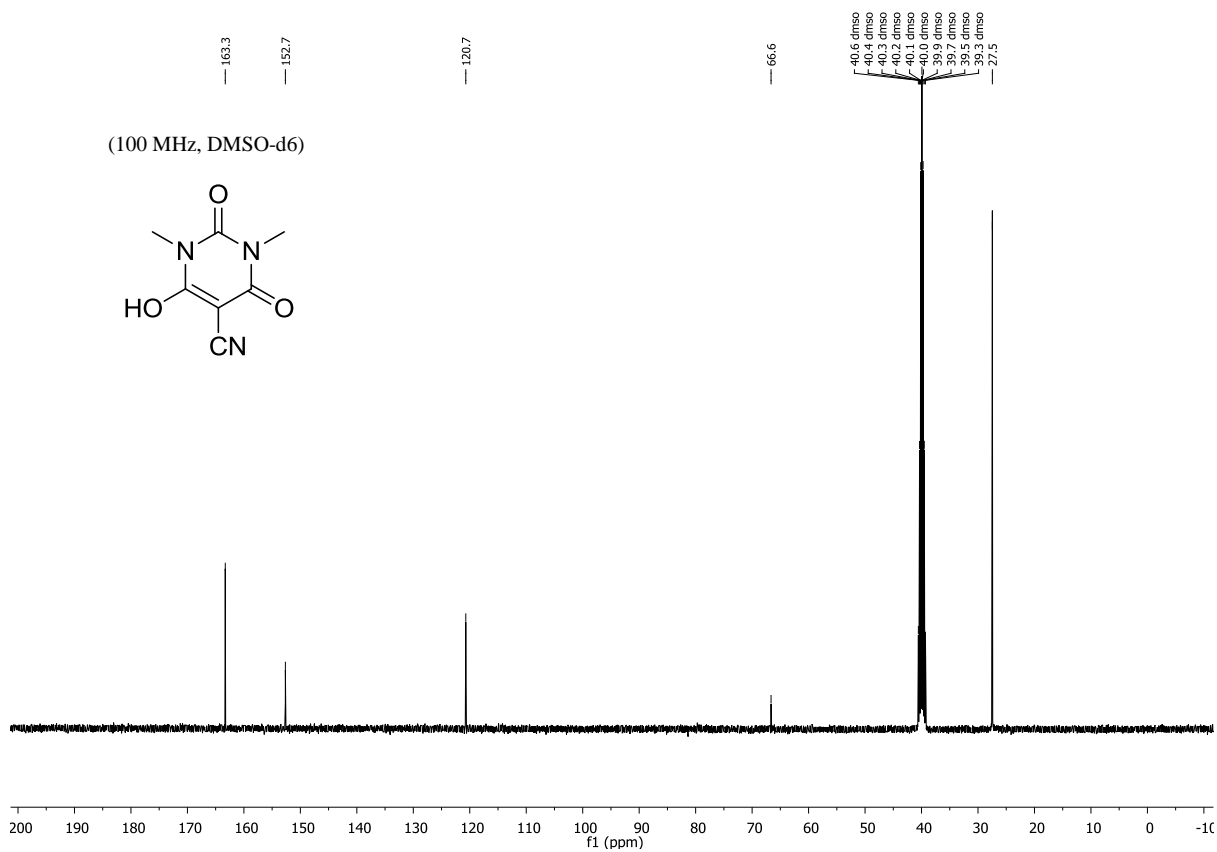

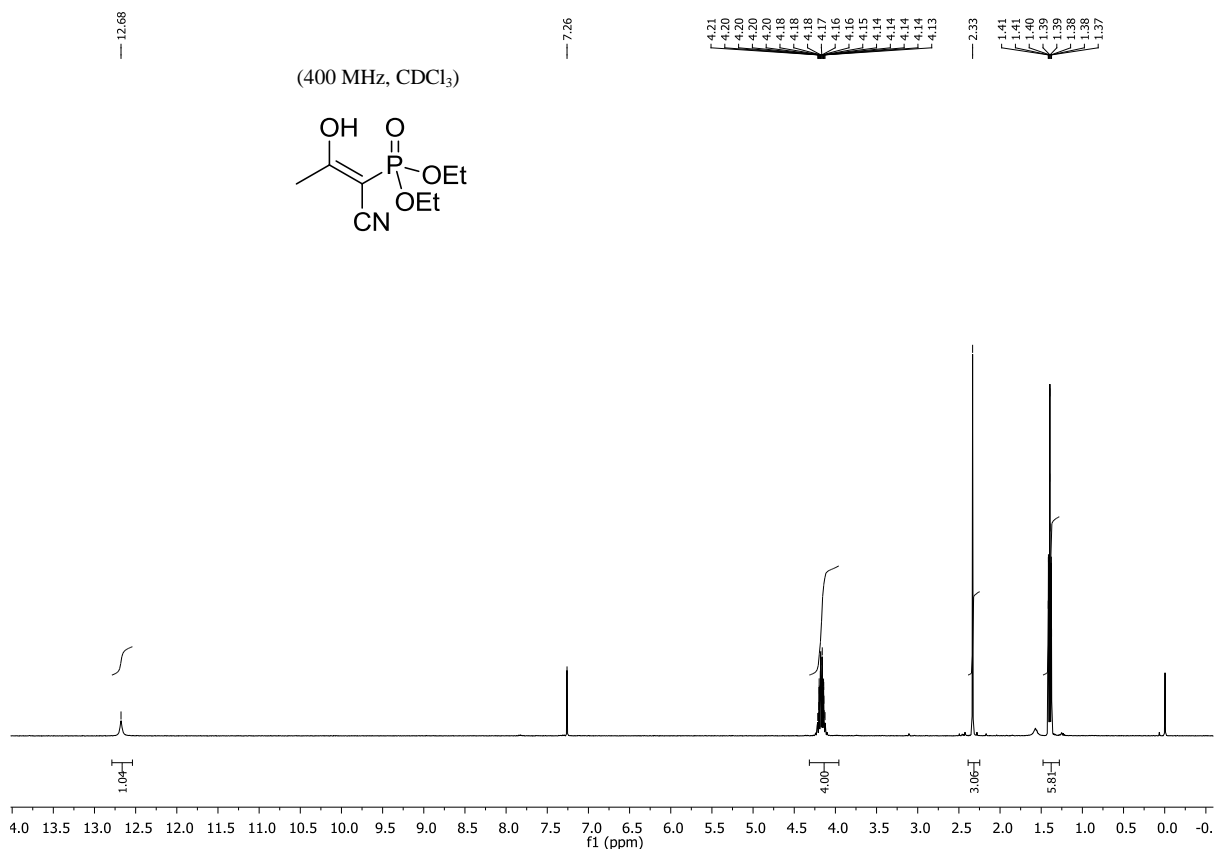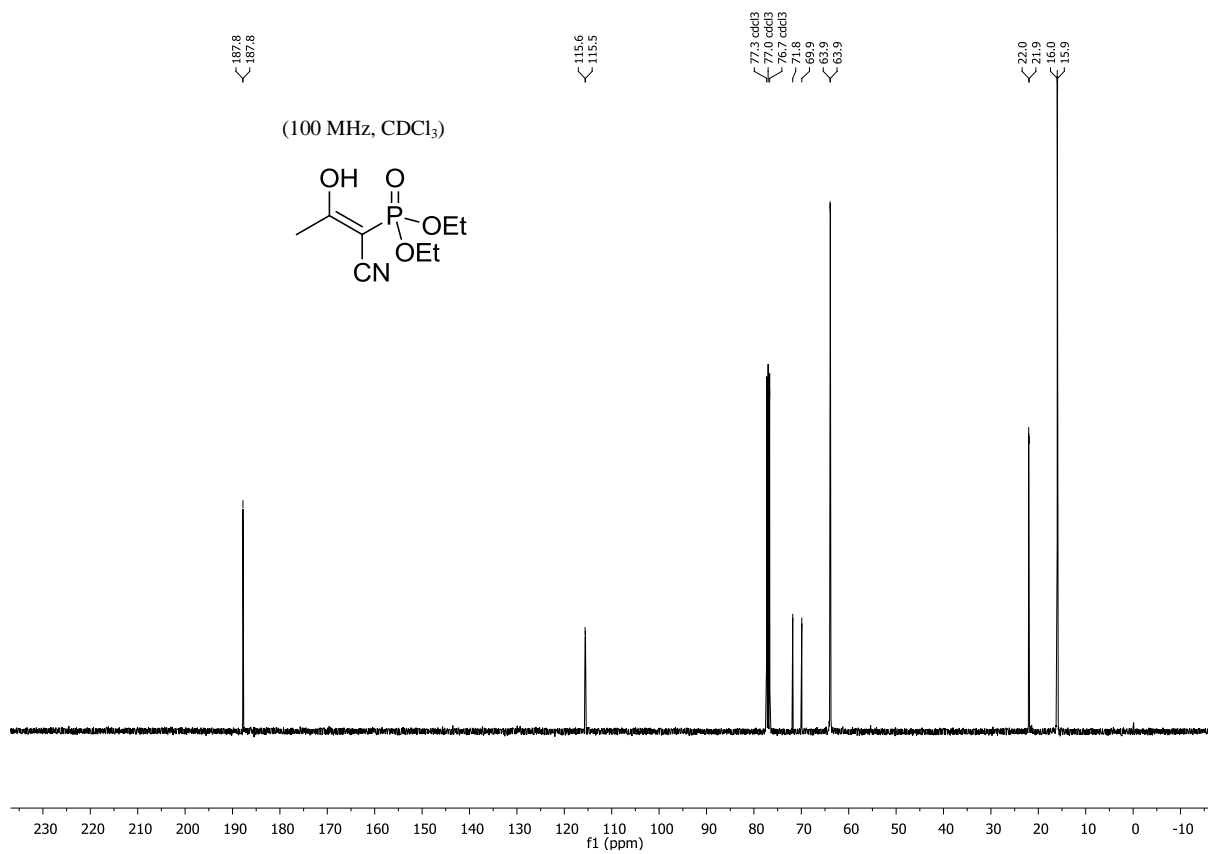

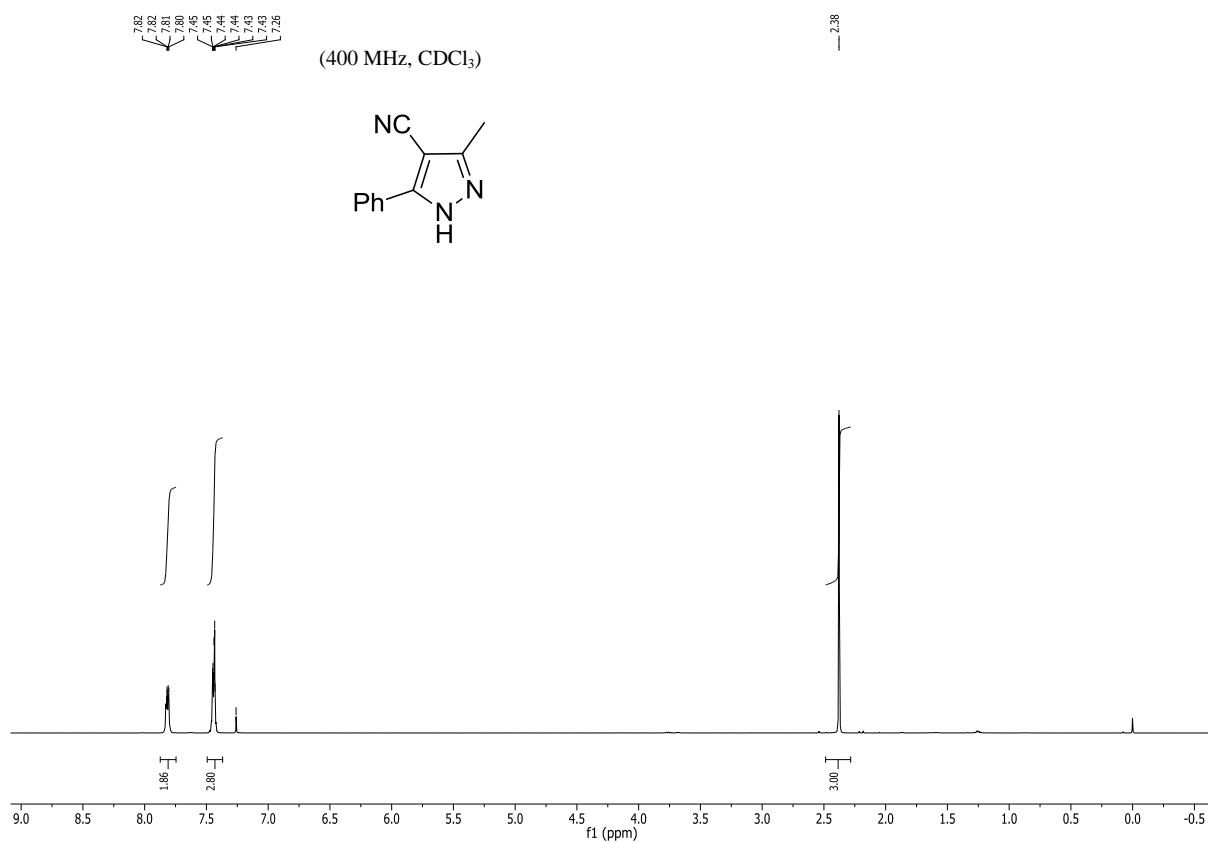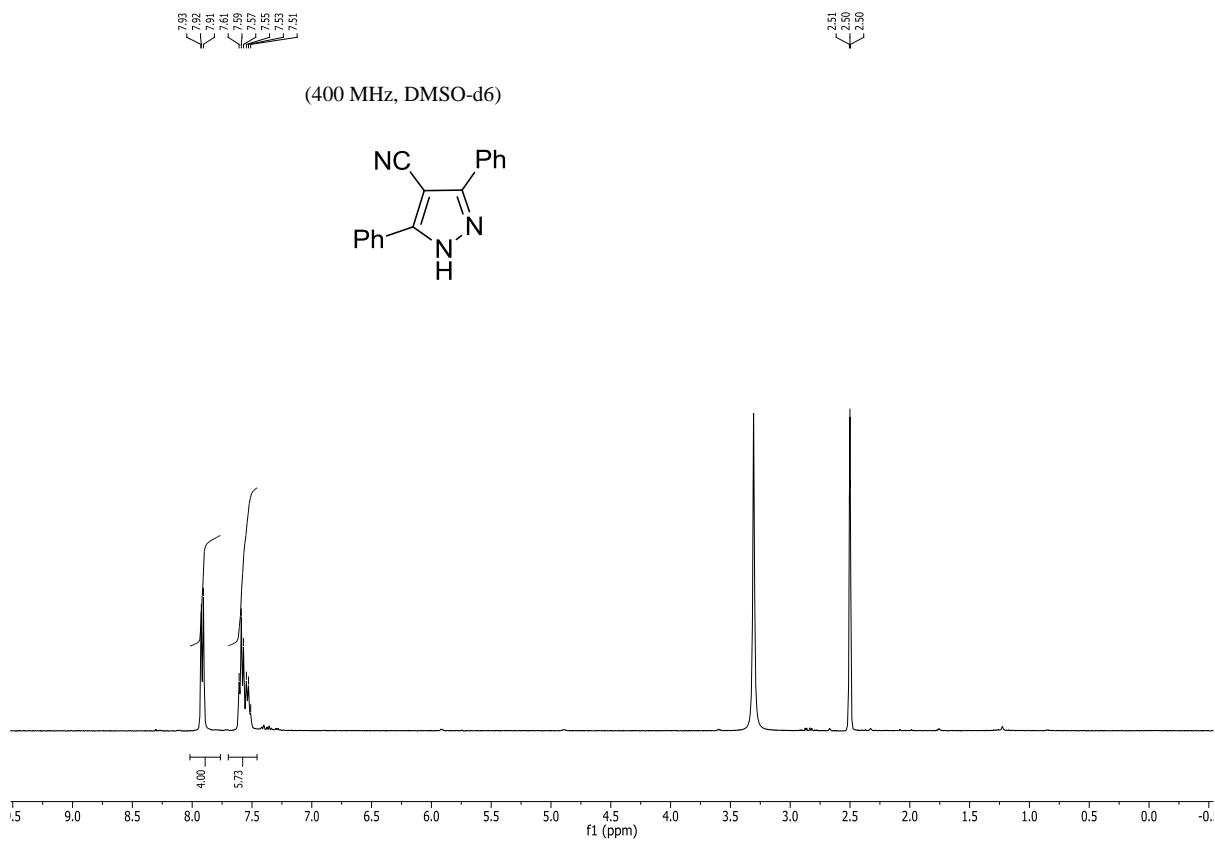

Supplement: c3ra41376d.pdf [file c3ra41376d.pdf]
